# Supplementary material for: Reference Genes Selection and Normalization of Oxidative Stress Responsive Genes upon Different Temperature Stress Conditions in Hypericum perforatum L
Source: PubMed Central journal article supplement (PMC4263753; doi:10.1371/journal.pone.0115206), 2014-12-11
Supplement: pone.0115206.s002.pdf [file pone.0115206.s002.pdf]

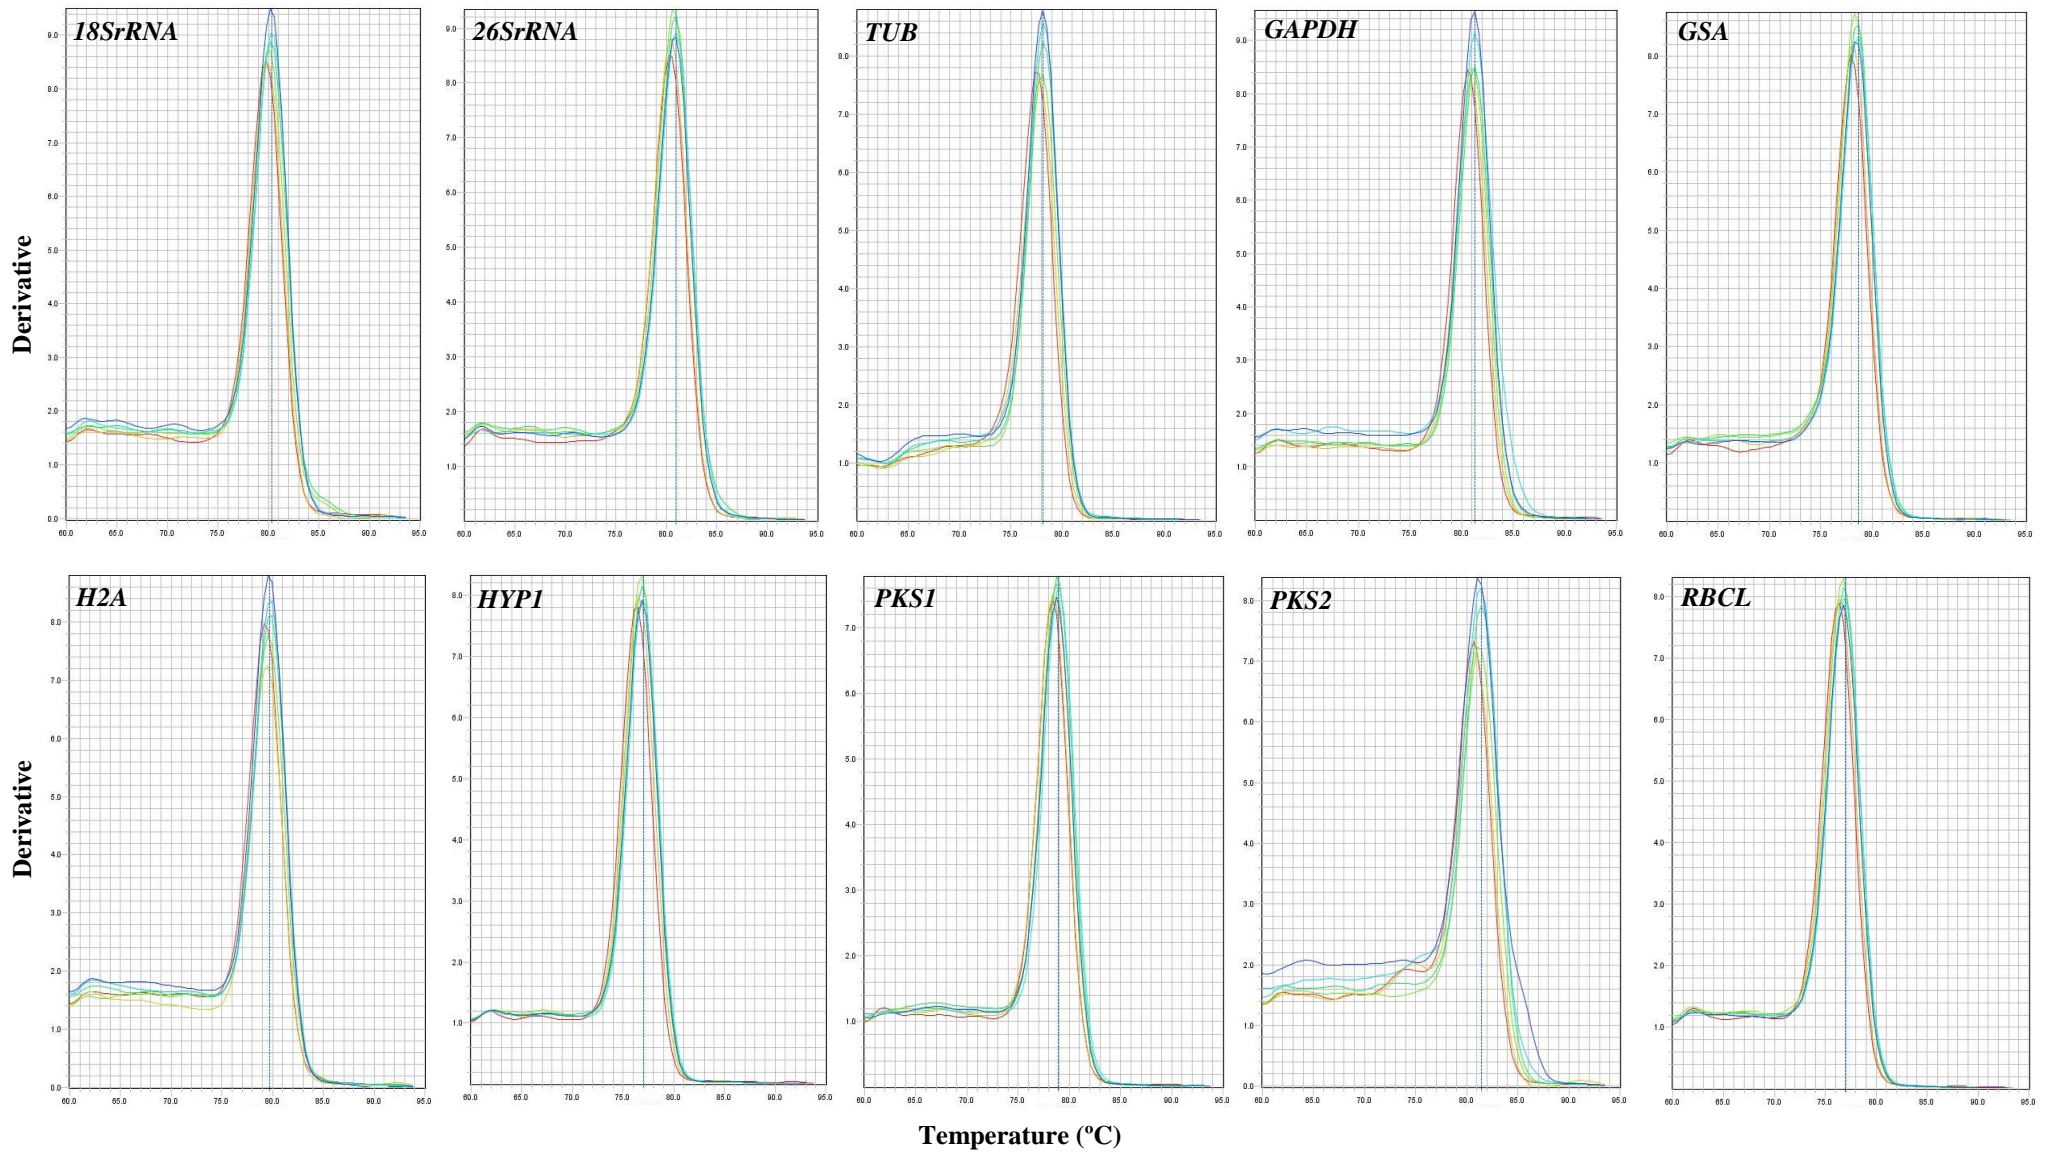

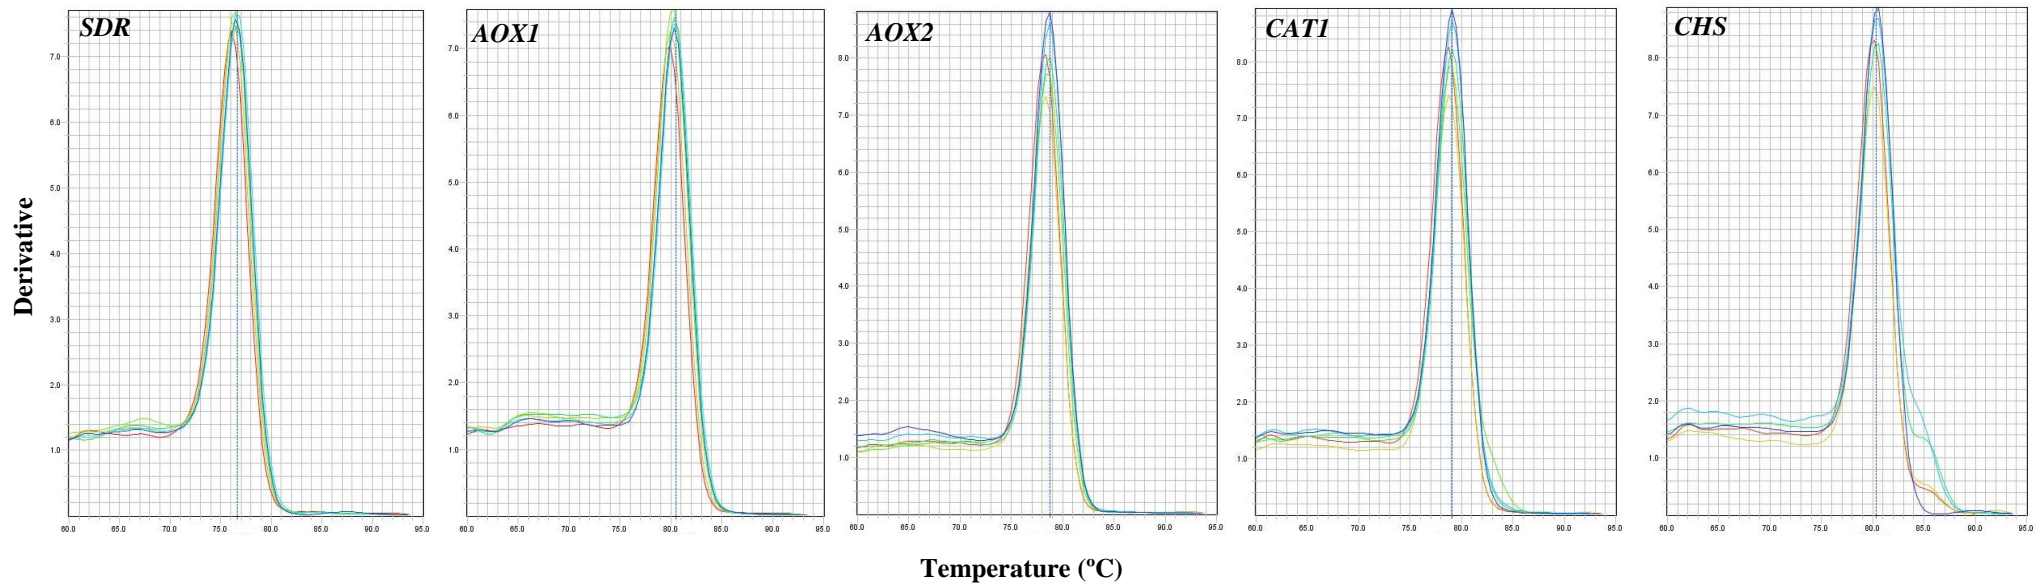

Temperature (°C)
